# Supplementary material
Source: Springer Nature journal article supplement (https://www.springermedizin.de/resource/supplementary/13550_2012_71_MOESM9_ESM.pdf/9687552)

**Supplementary Figure 12. SPECT and CT fused slices of the contrast phantom imaged with Siemens Symbia T6.** SPECT reconstructions were performed with Siemens Flash3D including attenuation and scatter correction and resolution recovery, 24 iterations and eight subsets. (A) Transverse slice of the hot rods. (B) Transverse slice of the cold rods. (C) Coronal slice. The part at the bottom of the coronal slice is a grid and was not used in this work.

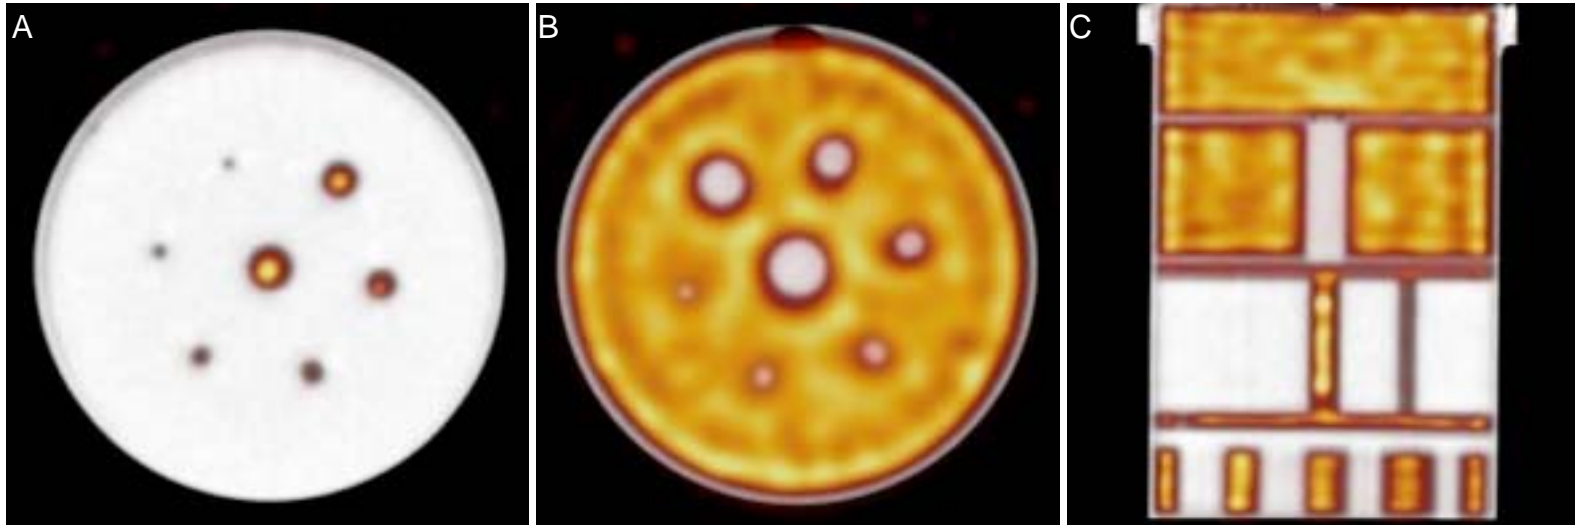

Supplement: MOESM9 [file 9687552]
